# Supplementary material
Source: MDPI journal article supplement (https://www.mdpi.com/2073-4344/13/7/1147)
Supplement: s1 [file s1]

## Supporting Information

# Photothermal-Assisted Photocatalytic Degradation of Tetracycline in Seawater Based on the Black g-C<sub>3</sub>N<sub>4</sub> Nanosheets with Cyano Group Defects

Loic Jiresse Nguetsa Kuate,<sup>a1</sup> Zhouze Chen,<sup>b1</sup> Jialin Lu,<sup>a</sup> Huabing Wen,<sup>a</sup> Feng Guo,<sup>a\*</sup> and Weilong Shi<sup>b\*</sup>

<sup>a</sup>School of Energy and Power, Jiangsu University of Science and Technology, Zhenjiang, Jiangsu 212003, PR China.

<sup>b</sup>School of Material Science and Engineering, Jiangsu University of Science and Technology, Zhenjiang, Jiangsu 212003, PR China;

\* Correspondence: gfeng0105@126.com (F. Guo); shiwl@just.edu.cn (W. Shi).

<sup>1</sup>The authors contributed equally to this work.

### 1. Characterizations

The crystalline phase structures of as-prepared CN and CN-B composites were characterized by German Bruker-AXSSM D8 X-ray diffraction (XRD) under Cu-K irradiation at 2θ angles of 10-80°. The morphology and elemental composition of as-prepared samples were detected by a scanning electron microscope (SEM) and an energy dispersive x-ray (EDX) by using an instrument scanning electron microscope (JSM-7001F (Japan). Transmission electron microscope (TEM) was obtained by a FEI-Tecnaï TM G2F30 with a field-emission gun operating at 200 kV. The Fourier transform infrared spectroscopy (FT-IR) was obtained using infrared Prestige-21 spectrometer. The X-ray photoelectron spectroscopy (XPS) was measured using a scale 250Xi instrument (K-Alpha, Thermo Fisher Scientific) with a calibration standard of 284.6 eV and the XPS spectra were fitted using XPSPEAK41 software. The UV-vis absorption spectra of powder samples were measured using a UV-2450 with BaSO<sub>4</sub> as a reflectometer. Photoluminescence (PL) spectra were obtained by a luminescence spectrometer (RF-5301PC) at 320 nm excitation wavelength. Thermal camera (FLIR C3-X) was used to record the photothermal mapping images during the photocatalytic process.

### 2. Photoelectrochemical properties measurements

The photoelectrochemical experiments of the samples were all performed in a three-electrode system. Transient photocurrent curves, the Mott-Schottky (MS) curves and the electrochemical impedance spectrum (EIS) plots of the catalysts were measured using the CHI660B workstation. A calomel electrode, as-prepared samples and platinum wire were used as reference, working and counter electrodes, respectively, and a 300 W xenon lamp and saturated  $\text{Na}_2\text{SO}_4$  solution was employed as the light source and electrolyte.

### 3. Figures and Tables

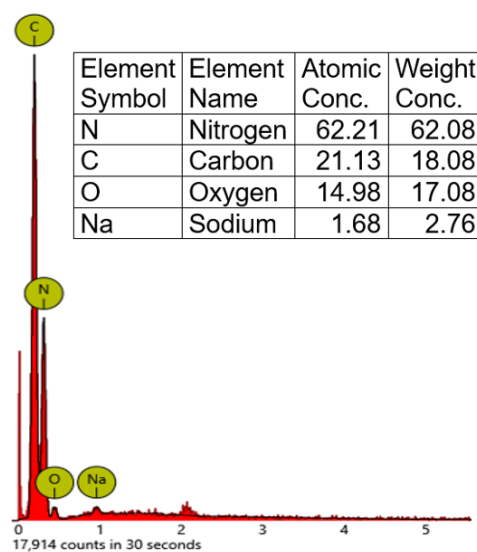

**Figure S1** Energy dispersive X-ray spectra (EDX) spectrum of CN-B-0.1 sample.

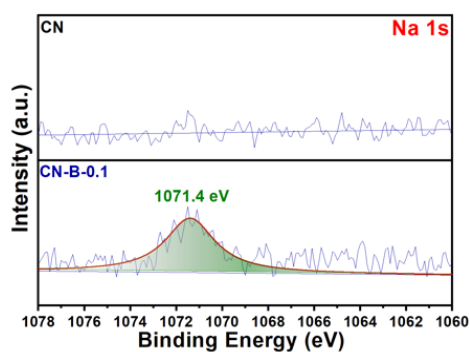

**Figure S2** High-resolution XPS spectra of Na 1s for CN and CN-B-0.1 photocatalysts.

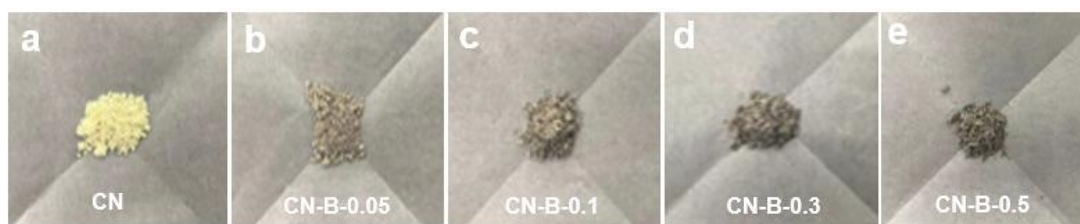

**Figure S3** Digital photos of (a) CN, (b) CN-B-0.05, (c) CN-B-0.1, (d) CN-B-0.3 and (e) CN-B-0.5.

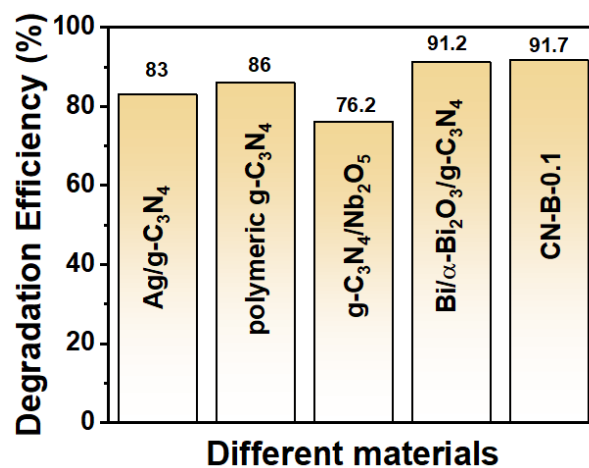

**Figure S4** Photocatalytic Tc degradation performance of CN-B-0.1 photocatalyst compared with the previously reported of the different materials.

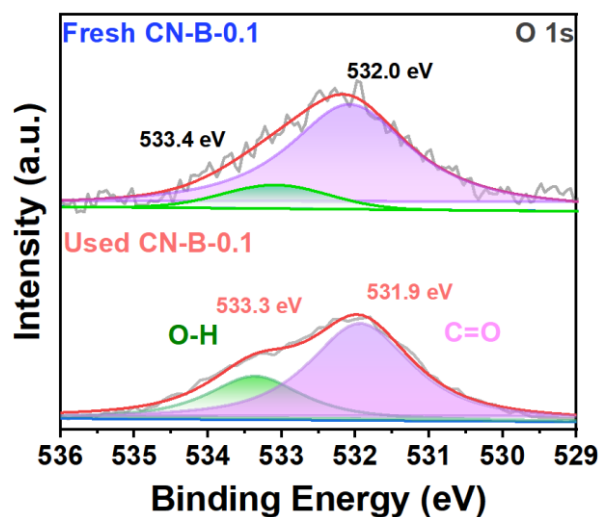

**Figure S5** High-resolution XPS spectra of O 1s of CN-B-0.1 photocatalyst before and after photocatalysis.

**Table S1** Surface relative element content of CN and CN-B-0.1 from XPS characterizes.

| Samples  | Atomic compositions (%) |       |      |      |      |
|----------|-------------------------|-------|------|------|------|
|          | C                       | N     | O    | Na   | C/N  |
| CN       | 45.29                   | 52.14 | 2.28 | 0.3  | 0.87 |
| CN-B-0.1 | 49.96                   | 46.16 | 3.65 | 0.23 | 1.08 |

**Table S2** Photocatalytic Tc degradation performance of CN-B-0.1 photocatalyst compared with the previously reported of the different materials.

| Photocatalyst                                                                 | Photocatalyst dose (g/L) | TC concentration (mg/L) | Light source     | Degradation(%) /Time (min) | Rate constant (min <sup>-1</sup> ) | Ref.      |
|-------------------------------------------------------------------------------|--------------------------|-------------------------|------------------|----------------------------|------------------------------------|-----------|
| Ag/g-C <sub>3</sub> N <sub>4</sub>                                            | 1.67                     | 20                      | Xenon<br>(300 W) | 83/120                     | 0.0120                             | [72]      |
| polymeric g-C <sub>3</sub> N <sub>4</sub>                                     | 1.0                      | 20                      | Xenon<br>(35 W)  | 86/240                     | 0.0051                             | [73]      |
| g-C <sub>3</sub> N <sub>4</sub> /Nb <sub>2</sub> O <sub>5</sub>               | 0.5                      | 20                      | Xenon<br>(250 W) | 76.2/150                   | 0.0096                             | [74]      |
| Bi/ $\alpha$ -Bi <sub>2</sub> O <sub>3</sub> /g-C <sub>3</sub> N <sub>4</sub> | 1.0                      | 10                      | Xenon<br>(300 W) | 91.2/180                   | 0.0122                             | [75]      |
| CN-B-0.1                                                                      | 0.5                      | 30                      | LED<br>(300 W)   | 91.7/120                   | 0.0242                             | This work |

## References

- [72] W. Xu, S. Lai, S.C. Pillai, W. Chu, Y. Hu, X. Jiang, M. Fu, X. Wu, F. Li, H. Wang, Visible light photocatalytic degradation of tetracycline with porous Ag/graphite carbon nitride plasmonic composite: degradation pathways and mechanism, *J. Colloid Interface Sci.* 574 (2020) 110-121.
- [73] D.B. Hernandez-Uresti, A. Vazquez, D. Sanchez-Martinez, S. Obregon, Performance of the polymeric g-C<sub>3</sub>N<sub>4</sub> photocatalyst through the degradation of pharmaceutical pollutants under UV-vis irradiation, *J. Photo chem. Photo biol. A* 324 (2016) 47-52.
- [74] Y. Hong, C. Li, G. Zhang, Y. Meng, B. Yin, Y. Zhao, W. Shi, Efficient and stable Nb<sub>2</sub>O<sub>5</sub> modified g-C<sub>3</sub>N<sub>4</sub> photocatalyst for removal of antibiotic pollutant, *Chem. Eng. J.* 299 (2016) 74-84.
- [75] D. Chen, S. Wu, J. Fang, S. Lu, G. Zhou, W. Feng, F. Yang, Y. Chen, Z. Fang, A nanosheet-like  $\alpha$ -Bi<sub>2</sub>O<sub>3</sub>/g-C<sub>3</sub>N<sub>4</sub> heterostructure modified by plasmonic metallic Bi and oxygen vacancies with high photodegradation activity of organic pollutants, *Sep. Purif. Technol.* 193 (2018) 232-241.
